# Supplementary material for: Validation and Psychometric Properties of the Italian Version of the Unconditional Self-Kindness Scale (USKS)
Source: MDPI journal article supplement (doi:10.3390/ijerph20105839), 2023-05-16
Supplement: s1 [file s1]

# Supplementary Materials

Table S1.

Shapiro-Wilk statistics for the item scores distribution of the 6-item USKS ( $n = 332$ ).

| Item   | 7-point scoring |     |       |
|--------|-----------------|-----|-------|
|        | W               | df  | $p$   |
| usks01 | 0.989           | 332 | 0.075 |
| usks02 | 0.991           | 332 | 0.079 |
| usks03 | 0.986           | 332 | 0.071 |
| usks04 | 0.987           | 332 | 0.073 |
| usks05 | 0.992           | 332 | 0.081 |
| usks06 | 0.988           | 332 | 0.074 |

Note: W = Shapiro-Wilk statistic; df = degrees of freedom; all Shapiro-Wilk tests showed normal distributions with  $p > .05$  and  $W \rightarrow 1$ .

Table S2.

*Goodness-of-fit indices for the Exploratory Structural Equation Modeling (ESEM) on the first random subsample ( $n = 153$ ).*

| Model      | $\chi^2$ | df | CFI  | TLI  | RMSEA [90% CI]    |
|------------|----------|----|------|------|-------------------|
| One-factor | 80.776   | 5  | .931 | .933 | .022 [.031; .037] |
| Bifactor   | 405.089  | 5  | .665 | .767 | .285 [.249; .357] |

Note: all chi-square tests were significant at  $p < .001$ ; df = degrees of freedom; CFI = Comparative Fit Index; TLI = Tucker Lewis Index; RMSEA = Root Mean Square Error of Approximation; CI = confidence interval.

*Table S3.*

*Loading matrix and factor correlations of the one-factor Confirmatory Factor Analysis model on the second random subsample ( $n = 179$ ).*

| Item   | F1                 |
|--------|--------------------|
| USKS01 | 0.731 [0.23; 0.41] |
| USKS02 | 0.849 [0.21; 0.39] |
| USKS03 | 0.868 [0.33; 0.49] |
| USKS04 | 0.835 [0.36; 0.59] |
| USKS05 | 0.879 [0.53; 0.67] |
| USKS06 | 0.882 [0.26; 0.48] |

Note: Bracketed values and the 95% confidence interval of the loading estimate.

Table S4.

*Italian version of the Unconditional Self-Kindness Scale (USKS).*

### Unconditional Self-Kindness Scale (USKS)

Per favore, risponda a queste domande nel modo più onesto possibile identificando un numero sulla scala seguente:

| Per niente |                                                                                                                      |   |   |   |   |   | Moltissimo | Punteggio |
|------------|----------------------------------------------------------------------------------------------------------------------|---|---|---|---|---|------------|-----------|
| 0          | 1                                                                                                                    | 2 | 3 | 4 | 5 | 6 |            |           |
| 1          | Quanto sei paziente e tollerante con te stesso quando sei criticato o rifiutato da un'altra persona?                 |   |   |   |   |   |            |           |
| 2          | Quanto sei amorevole e gentile con te stesso quando diventi consapevole dei tuoi difetti e imperfezioni personali?   |   |   |   |   |   |            |           |
| 3          | Quanto sei paziente e tollerante con te stesso quando fallisci o commetti un errore?                                 |   |   |   |   |   |            |           |
| 4          | Quanto sei amorevole e gentile con te stesso quando vieni criticato o rifiutato da un'altra persona?                 |   |   |   |   |   |            |           |
| 5          | Quanto sei paziente e tollerante con te stesso quando diventi consapevole dei tuoi difetti personali e imperfezioni? |   |   |   |   |   |            |           |
| 6          | Quanto sei amorevole e gentile con te stesso quando fallisci o commetti un errore?                                   |   |   |   |   |   |            |           |

#### **Scoring:**

Total USKS scoring

Sum of item scoring: 1+2+3+4+5+6

Per niente = 0; Moltissimo = 6

Table S5.

Measurement invariance across gender on the total sample ( $n = 332$ ).

| Number | Model           | $\chi^2$ | df | CFI   | TLI   | RMSEA | SRMR  | Model comparison | $\Delta\chi^2$ | $\Delta df$ | $\Delta CFI$ | $\Delta TLI$ | $\Delta RMSEA$ | $\Delta SRMR$ |
|--------|-----------------|----------|----|-------|-------|-------|-------|------------------|----------------|-------------|--------------|--------------|----------------|---------------|
| 1      | Configural      | 14.773   | 18 | 0.998 | 0.997 | 0.035 | 0.043 | -                | -              | -           | -            | -            | -              | -             |
| 2      | Metric (weak)   | 15.769   | 23 | 0.998 | 0.998 | 0.035 | 0.045 | 2 vs. 1          | 0.996          | 5           | 0            | 0.001        | 0              | 0.002         |
| 3      | Scalar (strong) | 15.769   | 29 | 0.995 | 0.996 | 0.039 | 0.045 | 3 vs. 2          | 0              | 6           | -0.003       | -0.002       | 0.004          | 0             |
| 4      | Strict          | 16.821   | 35 | 0.991 | 0.992 | 0.041 | 0.048 | 4 vs. 3          | 1.052          | 6           | -0.004       | -0.004       | 0.002          | 0.003         |

Note:  $\chi^2$  = chi-square value; df = degrees of freedom; CFI = Comparative Fit Index; TLI = Tucker Lewis Index; RMSEA = Root Mean Square Error of Approximation; SRMR = standardized root mean residual;  $\Delta$  = delta indicates the difference between values related to model comparisons.
